# Supplementary material
Source: PubMed Central journal article supplement (PMC10389270)
Supplement: NIHMS1916911-supplement-SI.pdf [file NIHMS1916911-supplement-SI.pdf]

Supporting Information for:

**Accurate Sizing of Nanoparticles Using a High-Throughput Charge Detection Mass Spectrometer without Energy Selection**

Conner C. Harper<sup>†</sup>, Zachary M. Miller<sup>†</sup>, Matthew S. McPartlan<sup>†</sup>, Jacob S. Jordan<sup>†</sup>, Randall E. Pedder<sup>‡</sup>, and Evan R. Williams<sup>†\*</sup>

*<sup>†</sup>Department of Chemistry, University of California, Berkeley, California, 94720-1460, United States*

*<sup>‡</sup>Ardara Technologies LP, Ardara, Pennsylvania, 15615, United States*

For submission to *ACS Nano*

\*Address correspondence to this author.

Email: [erw@berkeley.edu](mailto:erw@berkeley.edu)

Telephone: (510) 643-7161

## Table of Contents

|                                                   |    |
|---------------------------------------------------|----|
| Rayleigh Limit for Charged Aqueous Droplets ..... | S3 |
| Figure S1 .....                                   | S4 |

## Rayleigh Limit for Charged Aqueous Droplets

The extent of charging necessary for fission of a spherical droplet to occur is described by the Rayleigh equation:<sup>1</sup>

$$Z_R = 8\pi e(\epsilon_0 \gamma R^3)^{1/2} \quad (1)$$

where  $\gamma$  is the surface tension,  $Z_R$  is the charge on a spherical droplet with radius  $R$ ,  $\epsilon_0$  is the permittivity of free space, and  $e$  is the elementary charge. This can be rewritten to provide a relationship between mass and charge if the density of droplet,  $\rho$ , is known, as shown in eq. 2.

$$Z_R = 4e \sqrt{\frac{3\pi\epsilon_0\gamma m}{\rho}} \quad (2)$$

The values for  $\gamma$  and  $\rho$  used are those for bulk pure water at 20°C and are 72.8 mN/m and 0.9982 g/mL respectively.<sup>2</sup> Eq. 2 was used to calculate the Rayleigh limit for the mass vs. charge plots (blue dashed line) in Figure 1b as well as Figure S1.

## Reference

- (1) Rayleigh, Lord. XX. On the Equilibrium of Liquid Conducting Masses Charged with Electricity. *London, Edinburgh, Dublin Philos. Mag. J. Sci.* **1882**, 14 (87), 184–186.
- (2) Lide, D. R. *CRC Handbook of Chemistry and Physics*; CRC press, 2004; Vol. 85.

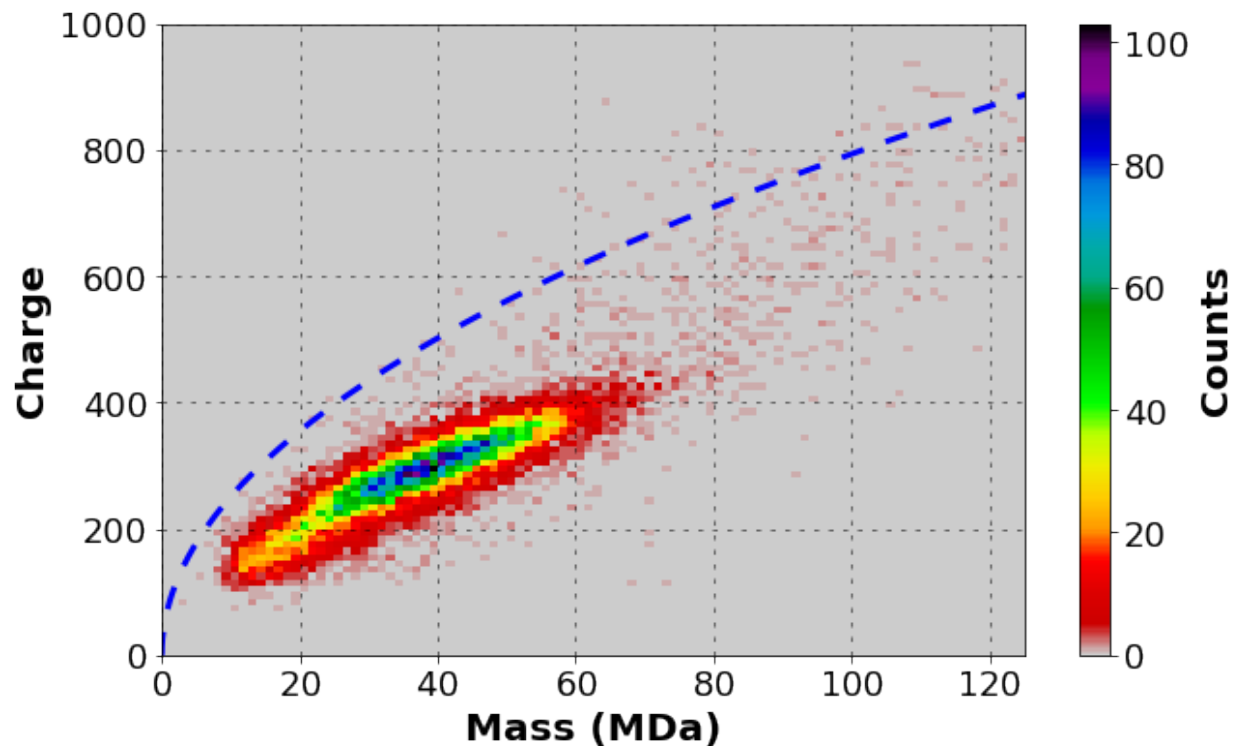

**Figure S1.** Two-dimensional mass vs. histogram for the ~50 nm nanoparticles. The blue dashed line is the Rayleigh charging limit of spherical droplets as a function of mass. The ~50 nm nanoparticles exhibit only a single smooth mass and charge distribution, suggesting that no dimers were present in this sample.
